# Supplementary material for: Comparing Executive Functions in Children and Adolescents with Autism and ADHD—A Systematic Review and Meta-Analysis
Source: MDPI journal article supplement (doi:10.3390/children11040473), 2024-04-15
Supplement: s1 [file s1]

**Table S1.** Summary of details of the included Studies - Neuropsychological Test

| Study<br>(1 <sup>st</sup> author, year) | Sample Size<br>(Male/Female)                            | Mean Age<br>M (SD)                                                           | Mean IQ<br>M (SD)                                                                     | Double Diagnosis<br>Yes/No | Med.   | EFs components                   | EFs Test                                               |
|-----------------------------------------|---------------------------------------------------------|------------------------------------------------------------------------------|---------------------------------------------------------------------------------------|----------------------------|--------|----------------------------------|--------------------------------------------------------|
| Corbett, 2009                           | ADHD 12/6<br>ASD 17/6<br>TD 12/6                        | ADHD 9.4(1.98)<br>ASD 9.44(1.96)<br>TD 9.56(1.81)                            | ADHD 105.17(12.82)<br>ASD 94.17(17.79)<br>TD 112.22(14.84)                            | No                         | No W/O | v-s WM<br>Inhib.<br>Flex<br>Plan | SWM-CANTAB<br>Stroop<br>D-K T-Switch, IED, CCTT<br>SoC |
| Boxhorn, 2018                           | ADHD 58/0<br>ASD 23/0<br>TD 22/0                        | ADHD 9.76(1.8)<br>ASD 10.04(2.3)<br>TD 9.77 (2.4)                            | ADHD 102.33(11.2)<br>ASD 104.96(18.3)<br>TD 112(13)                                   | No                         | W/O    | Inhib                            | GNG                                                    |
| Gaizhi-Li, 2017                         | ADHD 58/0<br>ASD 32/0<br>TD 39/0                        | ADHD 10.38(2.29)<br>ASD 10.31(3.34)<br>TD 10.72(2.21)                        | ADHD 99.26(11.79)<br>ASD 94.44(20.53)<br>TD 111.38(11.29)                             | No                         | W/O    | v-WM<br>Prob-Solv                | B-DigitSpan<br>Raven Matrices,<br>Block Design         |
| Geurts, 2004                            | ADHD 54/0<br>ASD 41/0<br>TD 41/0                        | ADHD 9.3(2)<br>ASD 9.4(1.8)<br>TD 9.1(1.7)                                   | ADHD 99.5(11.5)<br>ASD 98.3(18.4)<br>TD 115.5(18)                                     | No                         | W/O    | Inhib.<br>v-s WM<br>Plan<br>Flex | GNG, Circle Drawing, OW<br>SoP<br>ToL<br>WCST          |
| Goldberg, 2005                          | ADHD 19/2<br>ASD 13/4<br>TD 21/11                       | ADHD 9.8(1.3)<br>ASD 10.3(1.8)<br>TD 10.4(1.5)                               | ADHD 113.8(10.3)<br>ASD 96.5(15.9)<br>TD 112.6(12.1)                                  | No                         | W/O    | Inhib<br>Plan<br>Flex<br>v-s WM  | Stroop<br>SoC<br>IED<br>SWM-CANTAB                     |
| Gomarus, 2008                           | ADHD 11/4<br>ASD 13/2<br>TD 11/4<br>ADHD+ASD 10/5       | ADHD 9.82(1.09)<br>ASD 10.25(1.11)<br>TD 10.15(1.41)<br>ADHD+ASD 10.13(1.33) | ADHD 103.5(10.2)<br>ASD 108.6(17.5)<br>TD 107.1(15.6)<br>ADHD+ASD 101.9(14)           | Yes                        | W/O    | v-s WM                           | Visual Search                                          |
| Hutchison, 2016                         | ADHD 13/8<br>ASD 32/1<br>TD 19/9                        | ADHD 11(2.3)<br>ASD 11.64(2.8)<br>TD 10.43(3.22)                             | ADHD 107.1(14.8)<br>ASD 112.2(14.4)                                                   | No                         | W/O    | Flex                             | WCST                                                   |
| Hwang-Gu, 2019                          | ADHD 82/16<br>ASD 110/14<br>TD 208/41<br>ADHD+ASD 80/17 | ADHD 10.94(2.34)<br>ASD 11.49(2.58)<br>TD 11.53(2.56)<br>ADHD+ASD 11.83(2.6) | ADHD 102.87(13.18)<br>ASD 108.78(14.15)<br>TD 113.11(10.47)<br>ADHD+ASD 104.01(13.54) | Yes                        |        | Inhib                            | CPT                                                    |
| Johnson, 2007                           | ADHD 20/3<br>ASD 20/1<br>TD 15/3                        | ADHD 10.5(2.4)<br>ASD 12.2(2.4)<br>TD 11.1(1.9)                              | ADHD 98.7(14.6)<br>ASD 97.3(12.3)<br>TD 107.7(11.6)                                   | No                         | No W/O | Inhib                            | GNG                                                    |

**Table S1.** Continued

| Study<br>(1 <sup>st</sup> author, year) | Sample Size<br>(Male/Female)                      | Mean Age<br>M (SD)                                                           | Mean IQ<br>M (SD)                                                                   | Double Diagnosis<br>Yes/No | Med.   | EFs components             | EFs Test                                                  |
|-----------------------------------------|---------------------------------------------------|------------------------------------------------------------------------------|-------------------------------------------------------------------------------------|----------------------------|--------|----------------------------|-----------------------------------------------------------|
| Mahone,2006                             | ADHD 40/12<br>ASD 23/1<br>TD 34/26                | ADHD 9.3(1.2)<br>ASD 10(1.6)<br>TD 9.8(1.4)                                  | ADHD 109.7(12.6)<br>ASD 99.1(16.3)<br>TD 118.2(10.5)                                | No                         | No W/O | Inhib                      | CMRT, NEPSY -statue                                       |
| Matsuura,2014                           | ADHD 13/2<br>ASD 11/0<br>TD 12/7                  | ADHD 10.8(1.8)<br>ASD 12(2.2)<br>TD 11.4(1.6)                                | ADHD 103.8(14.9)<br>ASD 105.6(14.3)<br>TD 111.8(13.4)                               | No                         | W/O    | v-s WM<br>Prob-Solv        | SWM-CANTAB<br>Block Design, Raven<br>Matrices             |
| Nyden,1999                              | ADHD 10/0<br>ASD 10/0<br>TD 10/0                  | ADHD 10(0.9)<br>ASD 10.1(0.9)<br>TD 10(0.9)                                  | ADHD 91.2(13.11)<br>ASD 100.7(16.3)<br>TD                                           | No                         |        | Inhib<br>Flex              | GNG<br>WCST                                               |
| Ozonoff,1999                            | ADHD 40/<br>ASD 24/<br>TD 29/                     | ADHD 11.1(2)<br>ASD 12.6(3.4)<br>TD 12.1(3)                                  | ADHD 107.2(10.8)<br>ASD 95.2(18.8)<br>TD 107.8(10.8)                                | No                         |        | Flex<br>Plan<br>Inhib      | WCST<br>Toh<br>Stroop                                     |
| Karalunas,2018                          | ADHD 359/150<br>ASD 84/13<br>TD 146/155           | ADHD 9.72(1.59)<br>ASD 11.34(2.49)<br>TD 9.48 (1.59)                         | ADHD 108.27(13.88)<br>ASD 99.53(16.37)<br>TD 115.28(12.75)                          | No                         | W/O    | v-s WM<br>Flex<br>Inhib    | SSP-CANTAB<br>TMT<br>Stroop, GNG                          |
| Pitzianti,2016                          | ADHD 12/1<br>ASD 13/0<br>TD 12/1<br>ADHD+ASD 10/2 | ADHD 10.15(1.9)<br>ASD 10.69(2.1)<br>TD 11.85(2.7)<br>ADHD+ASD 10.25(2)      | ADHD 97.46(11.4)<br>ASD 106(17.41)<br>TD 106.31(11.84)<br>ADHD+ASD 108.36(14.84)    | Yes                        | W/O    | Plan<br>v WM<br>Inhib      | ToL<br>B-Digit Span<br>GNG                                |
| Salunkhe,2018                           | ADHD 35/5<br>ASD 19/2<br>TD 35/5<br>ADHD+ASD 16/3 | ADHD 10.29(1.44)<br>ASD 10.79(1.66)<br>TD 10.23(1.58)<br>ADHD+ASD 9.98(1.77) | ADHD 104.73(18.74)<br>ASD 109.1(21.12)<br>TD 107.2(18.33)<br>ADHD+ASD 103.95(19.43) | Yes                        | W/O    | v-s WM<br>Inhib            | NET<br>GNG                                                |
| Samyn,2015                              | ADHD 30/0<br>ASD 31/0<br>TD 95/53                 | ADHD 13.16(1.61)<br>ASD 12.83(1.41)<br>TD 12.73(1.48)                        | ADHD 108.2(12.63)<br>ASD 101.16(12.48)<br>TD 107.21 (11.68)                         | No                         | W/O    | Inhib                      | GNG, Stroop                                               |
| Samyn,2013                              | ADHD 25/0<br>ASD 25/0<br>TD 25/0                  | ADHD 13.16(1.61)<br>ASD 12.75(1.49)<br>TD 12.94(1.45)                        | ADHD 107.92(12.11)<br>ASD 101.24(11.45)<br>TD 104.92(10.23)                         | No                         | W/O    | Inhib                      | Flanker                                                   |
| Semrud-<br>Clikeman,2010                | ADHD 14/7<br>ASD 8/7<br>TD 23/9                   | ADHD 10(1.9)<br>ASD 10.6(2.6)<br>TD 9.8(2.1)                                 | ADHD 109.8(13.3)<br>ASD 100.8(13)<br>TD 109.4(10)                                   | No                         | W/O    | Plan<br>Inhib<br>Prob-Solv | Tower Task D-KEFS<br>Stroop<br>Fluid Reasoning-WJ COG III |

**Table S1.** Continued

| Study<br>(1 <sup>st</sup> author, year) | Sample Size<br>(Male/Female)                      | Mean Age<br>M (SD)                                                           | Mean IQ<br>M (SD)                                                                     | Double Diagnosis<br>Yes/No | Med. | EFs components                  | EFs Test                        |
|-----------------------------------------|---------------------------------------------------|------------------------------------------------------------------------------|---------------------------------------------------------------------------------------|----------------------------|------|---------------------------------|---------------------------------|
| Semrud-<br>Clikeman, 2010b              | ADHD 76/<br>ASD 50/<br>TD 113/                    | ADHD 10(24.4)<br>ASD 10.3(28.8)<br>TD 10.4(25.1)                             | ADHD 110(16.6)<br>ASD 107.3(17.6)<br>TD 111.9(14.3)                                   | No                         | W/O  | Prob-Solv                       | Fluid Reasoning-WJ COG III      |
| Sinzig, 2008                            | ADHD 19/1<br>ASD 16/4<br>TD 14/6<br>ADHD+ASD 19/1 | ADHD 12.2(2)<br>ASD 14.3(3)<br>TD 13.1(3)<br>ADHD+ASD 10.9(3.1)              | ADHD 98(13.4)<br>ASD 112(17.7)<br>TD 113(11.9)<br>ADHD+ASD 103(13)                    | Yes                        | W/O  | Inhib<br>Flex<br>v-s WM<br>Plan | GNG<br>IED<br>SWM-CANTAB<br>SoC |
| Sinzig, 2008b                           | ADHD 27/3<br>ASD 16/4<br>TD 23/7<br>ADHD+ASD 20/1 | ADHD 12.9(3.1)<br>ASD 14.5(3)<br>TD 12.8(2.8)<br>ADHD+ASD 10.7(3.2)          | ADHD 102(15.8)<br>ASD 112(19)<br>TD 109(12.8)<br>ADHD+ASD 103(13)                     | Yes                        | W/O  | Inhib                           | GNG                             |
| Tsuchiya, 2004                          | ADHD 20/2<br>ASD 16/1<br>TD 13/12                 | ADHD 11.3(2.6)<br>ASD 12.5(4.3)<br>TD 12.7(3.1)                              | ADHD 98.3(15.1)<br>ASD 92.3(12.5)<br>TD                                               | No                         |      | Flex                            | WCST                            |
| Tye, 2013                               | ADHD 18/0<br>ASD 19/0<br>TD 26/0<br>ADHD+ASD 29/0 | ADHD 10.48(1.91)<br>ASD 11.69(1.7)<br>TD 10.56(1.79)<br>ADHD+ASD 10.53(1.69) | ADHD 104.11(14.23)<br>ASD 115.68(15.73)<br>TD 120.04(13.42)<br>ADHD+ASD 109.72(13.41) | Yes                        | W/O  | Inhib                           | CPT                             |
| Unterrainer, 2016                       | ADHD 42/0<br>ASD 18/0<br>TD 42/0<br>ADHD+ASD 23/0 | ADHD 9.83(2.15)<br>ASD 10.14(2.44)<br>TD 9.76(2.36)<br>ADHD+ASD 10.17(2.05)  | ADHD 94.46(14.29)<br>ASD 97.08(16.42)<br>TD 97.59(13.86)<br>ADHD+ASD 98.85(12.51)     | Yes                        | W/O  | Plan                            | ToL                             |
| Verté, 2006                             | ADHD 54/11<br>ASD 61/5<br>TD 67/15                | ADHD 9.1(2)<br>ASD 8.7(2)<br>TD 9.2(1.7)                                     | ADHD 99.8(11.7)<br>ASD 101.5(18.2)<br>TD 112.2(16)                                    | No                         | W/O  | Inhib<br>v-s WM                 | GNG<br>SoP                      |
| Wang, 2018                              | ADHD 23/5<br>ASD 20/1<br>TD 19/9                  | ADHD 8.18(1.93)<br>ASD 9.05(2.38)<br>TD 8.92(1.68)                           | ADHD 93.25(7.23)<br>ASD 99.53(17.78)<br>TD 110.14(11.91)                              | No                         | W/O  | Flex<br>v-s WM                  | WCST<br>CBTT                    |
| Xiao, 2012                              | ADHD 16/0<br>ASD 19/0<br>TD 16/0                  | ADHD 9.75(1.8)<br>ASD 10.11(2.08)<br>TD 9.69(1.74)                           | ADHD 103.63(8.13)<br>ASD 99.26(9.03)<br>TD 105.63(13.12)                              | No                         |      | Inhib                           | GNG, Stroop                     |

Table S1. Continued

| Study<br>(1 <sup>st</sup> author, year) | Sample Size<br>(Male/Female)                      | Mean Age<br>M (SD)                                                            | Mean IQ<br>M (SD)                                                                     | Double Diagnosis<br>Yes/No | Med. | EFs components | EFs Test    |
|-----------------------------------------|---------------------------------------------------|-------------------------------------------------------------------------------|---------------------------------------------------------------------------------------|----------------------------|------|----------------|-------------|
| Yasumura,2014                           | ADHD 8/2<br>ASD 7/4<br>TD 6/9                     | ADHD 11.8(2.23)<br>ASD 10.51(2.3)<br>TD 9.56(1.51)                            | ADHD > 80<br>ASD > 80<br>TD > 80                                                      | No                         |      | Inhib          | Stroop      |
| Azadi Sohi,2012                         | ADHD 35/0<br>ASD 19/0<br>TD 42/0<br>ADHD+ASD 24/0 | ADHD 11.02(2.66)<br>ASD 11.12(1.64)<br>TD 10.55(2.43)<br>ADHD+ASD 10.63(2.13) | ADHD 100.69(14.16)<br>ASD 111.47(15.98)<br>TD 120.83(13.06)<br>ADHD+ASD 105.64(13.14) | Yes                        | W/O  | Inhib          | GNG         |
| Manteris,2013                           | ADHD 12/8<br>ASD 15/3<br>TD 8/13                  | ADHD 9.06(1.18)<br>ASD 8.84(1.59)<br>TD 8.96(1.31)                            | ADHD 116.55(13.21)<br>ASD 102.33(14.87)<br>TD 116.33(12.87)                           | No                         | W/O  | Flex<br>Inhib  | WCST<br>GNG |
| Shahabbudin,2015                        | ADHD 9/7<br>ASD 12/4<br>TD 9/7<br>ADHD+ASD 15/1   | ADHD 8.89(0.72)<br>ASD 9.68(0.81)<br>TD 9.37(0.84)<br>ADHD+ASD 9.71(0.86)     | ADHD 103.55(10.26)<br>ASD 101.75(12.11)<br>TD 101.18(2.97)<br>ADHD+ASD 99.47(8.82)    | Yes                        |      | Inhib          | CPT         |

*Note.* Medication: W/O= no medication/ adequate period of washout from all medications; No W/O= inadequate period of washout/partial washout;

EFs components: v-sWM= visuo spatial WM; vWM= verbal WM; inhib= inhibition; Flex= cognitive flexibility; Plan=planning; Prob-Solv= problem-solving;

Tasks: SWM= spatial working memory (CANTAB); D-K T switch= Delis-Kaplan Executive Function System- total switching; B-Digit Span = backward digit span (Wechsler Intelligence Scale for Children, IV); IED= Intradimensional-Extradimensional Shift of CANTAB; CCTT= Child Color Trail Test; SoC= Stocking of Cambridge; GNG= Go/No-Go; OW= opposite worlds of TEA-ch; SoP= self-ordered point; ToL= tower of London; WCST= Wisconsin Card Sorting Test; CMRT= conflicting motor response task and contralateral motor response task; TMT=trail making test; ToH=tower of Hanoi; NBT= N-Back Task; WJ COG III= Fluid intelligence reasoning of the Woodcock-Johnson Cognitive Battery III; CBTT= Corsi Block Tapping Test.

**Table S2** | Summary of details of the included Studies - Questionnaires

| Study<br>(1 <sup>st</sup> author, year) | Sample Size<br>(Male/Female)                       | Mean Age<br>M (SD)                                                    | Mean IQ<br>M (SD)                                                            | Double Diagnosis<br>Yes/No | Med.   | EFs Questionnaire | Rater<br>(Parent/Teacher/Children) |
|-----------------------------------------|----------------------------------------------------|-----------------------------------------------------------------------|------------------------------------------------------------------------------|----------------------------|--------|-------------------|------------------------------------|
| Berenguer,2018                          | ADHD 33/2<br>ASD 27/2<br>TD 23/14<br>ADHD+ASD 20/2 | ADHD 9.14(1.4)<br>ASD 8.39(1.3)<br>TD 8.54(1.2)<br>ADHD+ASD 8.86(1.3) | ADHD 99.03(9.8)<br>ASD 100.37(12.4)<br>TD 102.11(8.9)<br>ADHD+ASD 102.86(13) | Yes                        | No W/O | BRIEF             | Teacher                            |
| Hovik,2017                              | ADHD 20/13<br>ASD 28/6<br>TD 32/18                 | ADHD 11.6(2.1)<br>ASD 11.9(2.3)<br>TD 11.6(2)                         | ADHD 96.8(13.8)<br>ASD 98.2(18.6)<br>TD 103.8(12.9)                          | No                         | W/O    | BRIEF             | Parent                             |
| Samyn,2011                              | ADHD 27/0<br>ASD 27/0<br>TD 27/0                   | ADHD 13.21(1.57)<br>ASD 12.73(1.46)<br>TD 12.91(1.43)                 | ADHD 107.81(13.21)<br>ASD 102.22(11.69)<br>TD 105.04(10.71)                  | No                         | W/O    | EATQ-R; ACS       | Parent; Children                   |
| Samyn,2015                              | ADHD 30/0<br>ASD 31/0<br>TD 95/53                  | ADHD 13.16(1.61)<br>ASD 12.83(1.41)<br>TD 12.73(1.48)                 | ADHD 108.2(12.63)<br>ASD 101.16(12.48)<br>TD 107.21(11.68)                   | No                         | W/O    | EATQ-R; ACS       | Parent; Children                   |
| Semrud-Clikeman,<br>2010                | ADHD 14/7<br>ASD 8/7<br>TD 23/9                    | ADHD 10(1.9)<br>ASD 10.6(2.6)<br>TD 9.8(2.1)                          | ADHD 109.8(13.3)<br>ASD 100.8(13)<br>TD 109.4(10)                            | No                         | W/O    | BRIEF             | Parent                             |

*Note.* BRIEF= Behavior Rating Inventory of Executive Function; EATQ-R= Early Adolescent Temperament Questionnaire-Revised; ACS= Attentional Control Scale

**Publication Bias**

**Figure S1.** Funnel plot ADHD vs ADHD+ASD

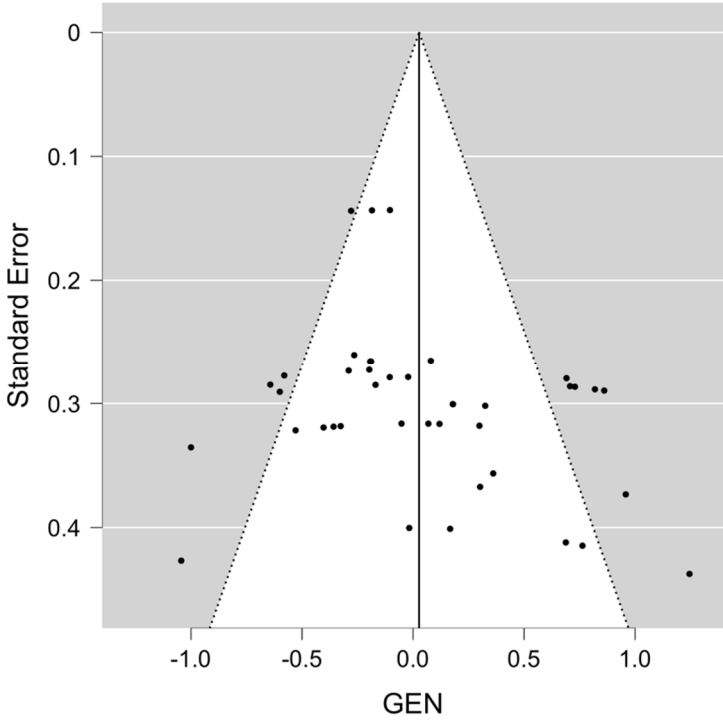

Rank Correlation test for funnel plot asymmetry shows no indication of publication bias (Kendall's tau=0.183,  $p=0.094$ )

**Figure S2.** Funnel plot ASD vs ADHD+ASD

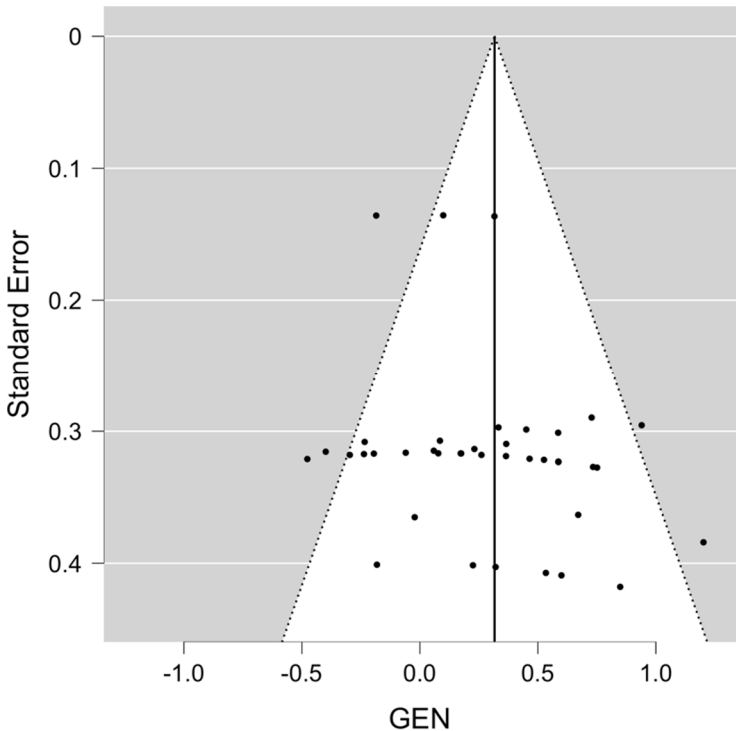

Rank Correlation test for funnel plot asymmetry shows no indication of publication bias (Kendall's tau=0.124,  $p=0.258$ )

**Table S3.** Descriptive Statistics of the comorbidity group (ADHD+ASD)

| <i>Variable</i> | ADHD+ASD<br>(N=298) |           |
|-----------------|---------------------|-----------|
|                 | <i>Mean</i>         | <i>SD</i> |
| Age             | 10.3                | 0.747     |
| IQ              | 104                 | 3.29      |
| Females         | 32 (11%)            |           |

**Main Analyses: ADHD vs ADHD+ASD comparison**

Comparing ADHD to the double diagnosis group resulted in a non-significant effect,  $Z = 0.517$ ,  $p = 0.605$ , associated to a low Cohen's  $d = 0.04$  ( $SE = 0.08$ ,  $CI = [-0.12, 0.20]$ ). This result meant that on the executive profile assessed through neuropsychological test, the ADHD group and the double diagnosis group did not differ. Test for the residual heterogeneity was still significant,  $Q(36) = 94.507$ ,  $p < .001$

**Main Analyses: ASD vs ADHD+ASD comparison**

On the contrary, comparing ASD to ADHD+ASD resulted in a significant effect,  $Z = 3.648$ ,  $p < .001$ ,  $d = 0.22$  ( $SE = 0.06$ ,  $CI = [0.101, 0.335]$ ), meaning that, on neuropsychological test, the ASD group generally performed better than the double diagnosis group, with an effect size of small magnitude. The heterogeneity statistic was significant,  $Q(36) = 53.456$ ,  $p = 0.031$

**Table S4.** Results of the standardized differences between ASD, ADHD and ADHD+ASD.

|                     | ADHD vs ADHD+ASD | ASD vs ADHD+ASD |
|---------------------|------------------|-----------------|
|                     | <i>d</i>         | <i>d</i>        |
| <i>d</i> Global EFs | 0.04             | 0.22***         |

**Moderation Analyses**

**Table S5.** Results of continuous moderators

| Contrast            | IQ Difference |        |          | Female Difference |       |          | Age Difference |        |          |
|---------------------|---------------|--------|----------|-------------------|-------|----------|----------------|--------|----------|
|                     | Slope         | Z      | <i>p</i> | Slope             | Z     | <i>p</i> | Slope          | Z      | <i>p</i> |
| ADHD vs<br>ADHD+ASD | 0.015         | 0.729  | 0.466    | 0.086             | 1.825 | 0.068    | -0.177         | -1.844 | 0.06     |
| ASD vs<br>ADHD+ASD  | -0.028        | -1.599 | 0.11     | 3.048             | 0.012 | 0.991    | -0.038         | -0.337 | 0.736    |

**Table S6.** Results of categorical moderators

| Contrast            | Type of Publication                |              |          |
|---------------------|------------------------------------|--------------|----------|
|                     | <i>(Published vs Dissertation)</i> |              |          |
|                     | <i>Q</i>                           | <i>d</i>     | <i>p</i> |
| ADHD vs<br>ADHD+ASD | 0.316                              | 0.02; 0.133  | 0.574    |
| ASD vs ADHD+ASD     | 0.731                              | 0.199; 0.157 | 0.393    |

*Note. Italic Text* indicates the levels of the categorical variable “type of publication”.
